# Supplementary material for: Green Synthesis of Boron Carbonitride with High Capacitance
Source: MDPI journal article supplement (doi:10.3390/ma11030387), 2018-03-06

# **Green Synthesis of Boron Carbonitride with High Capacitance**

Dongping Chen, Yanzhen Huang, Xinling Hu, Rongkai Li, Yingjiang Qian, Dongxu Li\*

College of Materials Science and Engineering, Huaqiao University, Xiamen, 361021, China

Corresponding Author E-mail: lidongxu@hqu.edu.cn

# Contents

|           |                                               |    |
|-----------|-----------------------------------------------|----|
| Figure S1 | FTIR of BCN sheets                            | S2 |
| Figure S2 | EDS and Elemental Mapping of BCN sheets       | S2 |
| Figure S3 | Adsorption and desorption curve of BCN sheets | S3 |
| Figure S4 | Nyquist plots of BCN sheets                   | S4 |

**Figure S1.** FTIR of BCN sheets

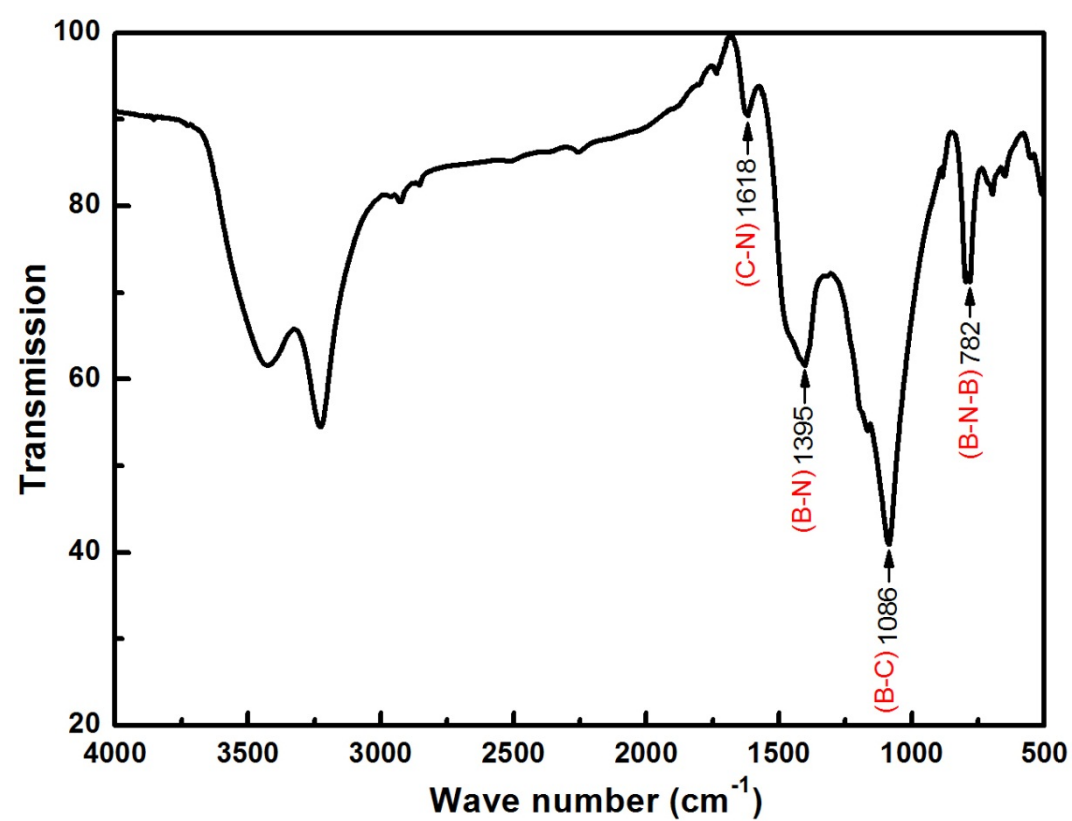

**Figure S2.** EDS and Elemental Mapping of BCN sheets

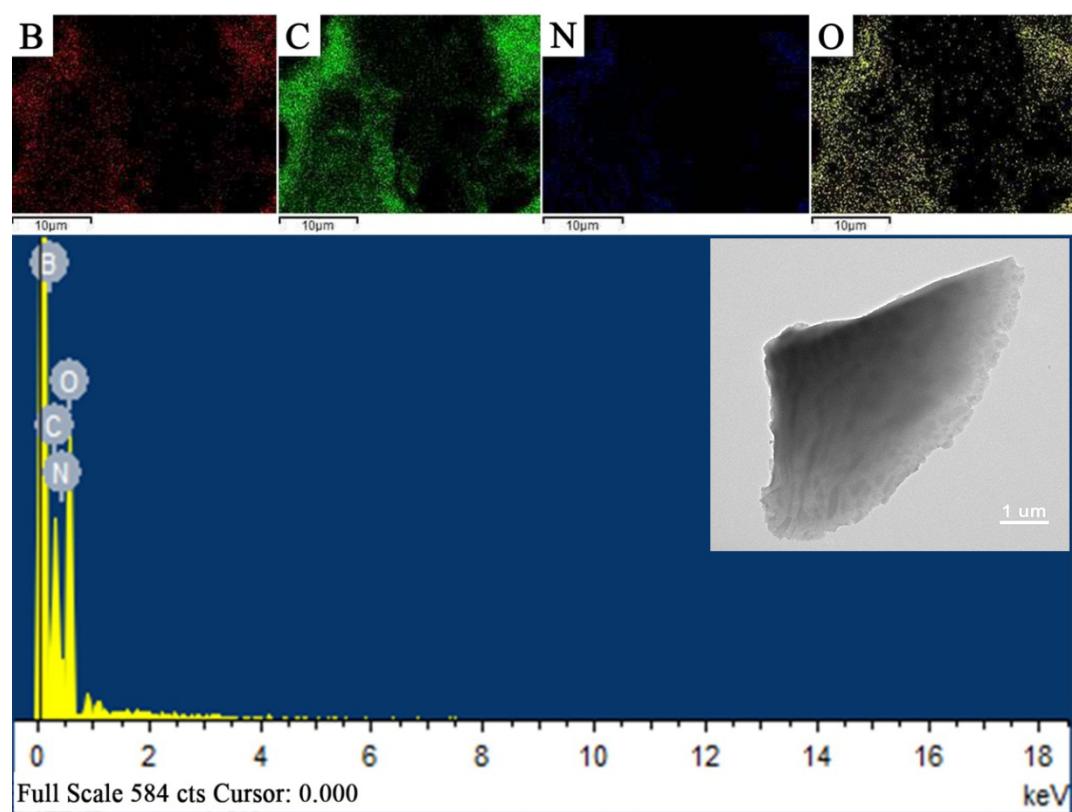

**Figure S3.** Adsorption and desorption curve of BCN sheets (BET surface area: 158 m<sup>2</sup>/g)

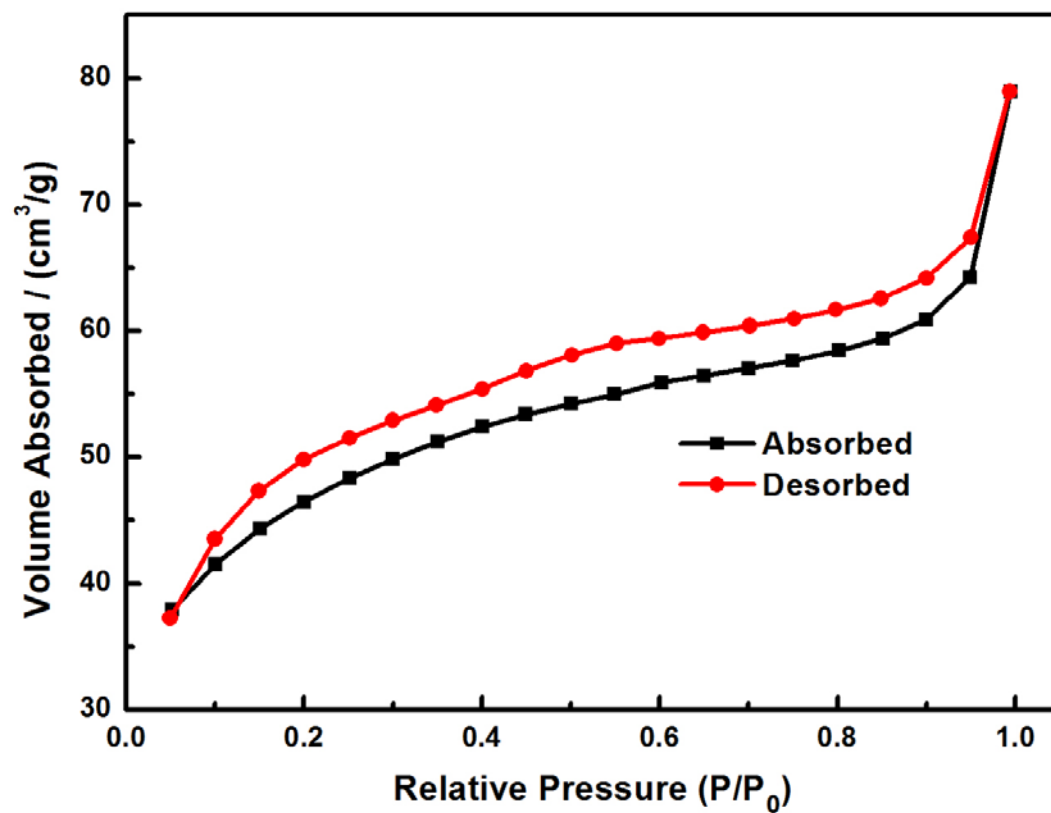

**Figure S4.** Nyquist plots of BCN sheets

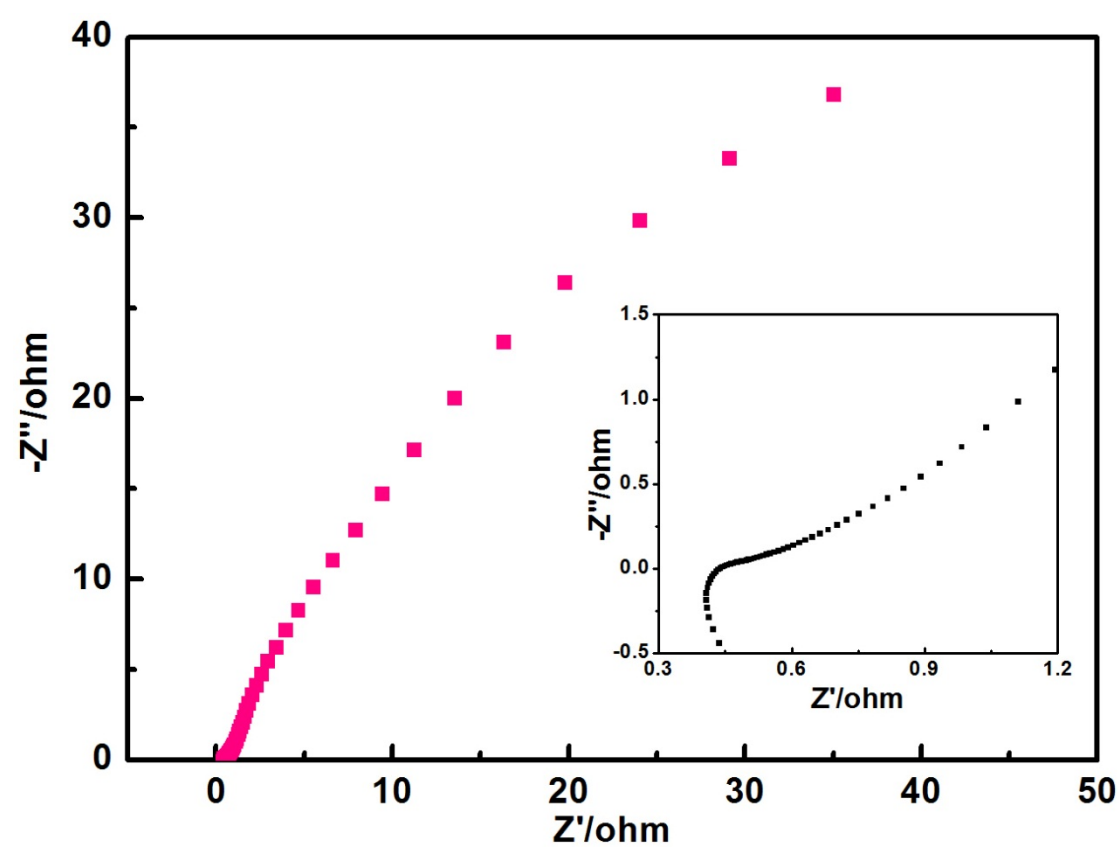

Supplement: s1 [file s1]
